# Supplementary material for: Oral iron supplementation with ferric maltol in patients with pulmonary hypertension
Source: PubMed Central journal article supplement — Eur Respir J. 2020 Nov 12;56(5):2000616. doi: 10.1183/13993003.00616-2020 (PMC7676873; doi:10.1183/13993003.00616-2020), 2020-11-12
Supplement: ERJ-00616-2020.Shareable.pdf [file ERJ-00616-2020.Shareable.pdf]

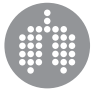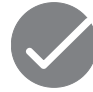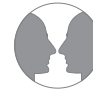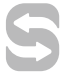

SHAREABLE PDF

# Oral iron supplementation with ferric maltol in patients with pulmonary hypertension

Karen M. Olsson<sup>1,2</sup>, Jan Fuge <sup>1,2</sup>, Torben Brod<sup>1</sup>, Jan C. Kamp <sup>1</sup>, Jan Schmitto<sup>3</sup>, Tibor Kempf<sup>4</sup>, Johann Bauersachs <sup>4</sup> and Marius M. Hoeper <sup>1,2</sup>

**Affiliations:** <sup>1</sup>Dept of Respiratory Medicine, Hannover Medical School, Hannover, Germany. <sup>2</sup>German Centre of Lung Research (DZL), Germany. <sup>3</sup>Dept of Cardiothoracic, Transplantation and Vascular Surgery, Hannover Medical School, Hannover, Germany. <sup>4</sup>Dept of Cardiology and Angiology, Hannover Medical School, Hannover, Germany.

**Correspondence:** Karen M. Olsson, Dept of Respiratory Medicine, Hannover Medical School, 30623 Hannover, Germany. E-mail: olsson.karen@mh-hannover.de

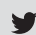

@ERSpublications

**Oral ferric maltol was well tolerated and effective in patients with pulmonary hypertension and iron deficiency anaemia. Restoration of iron stores corrected anaemia and resulted in improved right ventricular function and exercise tolerance** <https://bit.ly/2zMwvxc>

**Cite this article as:** Olsson KM, Fuge J, Brod T, *et al.* Oral iron supplementation with ferric maltol in patients with pulmonary hypertension. *Eur Respir J* 2020; 56: 2000616 [<https://doi.org/10.1183/13993003.00616-2020>].

This single-page version can be shared freely online.

*To the Editor:*

In patients with pulmonary hypertension and iron deficiency anaemia, oral iron supplementation with ferric maltol was well tolerated and restored iron and haemoglobin.
